# Supplementary material
Source: Research Square preprint supplement (doi:10.21203/rs.3.rs-9348747/v2)
Supplement: Supplementary file 1 [file f9d9a0b9a3bb2bb6680f14c6.docx]

**ONLINE RESOURCE**

*Supplementary Material*

*Bridging the Intention-Behavior Gap in Entrepreneurship Education: A Systematic Review of Theoretical Mechanisms and Venture Outcomes in German Higher Education*

*PRISMA 2020 Systematic Review - Supplementary Document*

**Contents**

OR1.1 PRISMA 2020 and PRISMA-OvR Compliance Statement

OR1.2 PRISMA 2020 Completed Checklist (27 items)

OR1.3 PRISMA 2020 Flow Diagram

OR1.4 Databases and Sources Searched

OR1.5 Full Verbatim Search Strategies

OR1.6 PICOS Eligibility Criteria - Full Specification

OR1.7 Quality Assessment - Newcastle-Ottawa Scale

OR1.8 Excluded Studies Table

References

**OR1.1 PRISMA 2020 and PRISMA-OvR Compliance Statement**

This review reports in accordance with the Preferred Reporting Items for Systematic Reviews and Meta-Analyses 2020 statement (PRISMA 2020; Page et al., 2021). It is additionally guided by the PRISMA extension for Overviews of Reviews (PRISMA-OvR; Pollock et al., 2023), because the primary synthesized units are existing quantitative meta-analyses and quasi-experimental program evaluations rather than individual primary studies.

The review was not formally preregistered. The protocol was developed prior to data collection to establish transparency and minimize post-hoc analytical decisions.

Searches were conducted across six electronic databases and supplementary sources. Screening was conducted independently by two screeners, with inter-rater reliability assessed using Cohen's kappa (pre-specified threshold: κ > .80) at both title/abstract and full-text stages. Actual kappa values: κ = 0.876 (title/abstract) and κ = 0.871 . Disagreements were resolved through discussion to consensus.

AI-assisted tools were used to support refinement of human-generated text and to assist in quality examination of data sources. All substantive analytical decisions, interpretations, and conclusions remain the sole responsibility of the authors.

*Page, M. J., et al. (2021). The PRISMA 2020 statement. BMJ, 372, n71.*

**OR1.2 PRISMA 2020 Completed Checklist**

All 27 PRISMA 2020 items are reported below with their manuscript locations. Items that are partially met are noted.

| **Section** | **Item** | **Domain** | **Requirement (abbreviated)** | **Location** | **Status** |
| --- | --- | --- | --- | --- | --- |
| Title | **1** | *Title* | Identify as systematic review. | Title page | ✓ |
| Abstract | **2** | *Abstract* | See PRISMA 2020 for Abstracts checklist. | Abstract | ✓ |
| Introduction | **3** | *Rationale* | Describe rationale in context of existing knowledge. | §1.1–1.2 | ✓ |
| Introduction | **4** | *Objectives* | Provide explicit statement of objectives or questions. | §1.3 | ✓ |
| Methods | **5** | *Eligibility criteria* | Specify inclusion/exclusion criteria and grouping for syntheses. | §3.3 + OR1.6 | ✓ |
| Methods | **6** | *Information sources* | Specify all databases, registers, websites searched. | §3.2 + OR1.4 | ✓ |
| Methods | **7** | *Search strategy* | Present full search strategies for all databases. | OR1.5 | ✓ |
| Methods | **8** | *Selection process* | Specify methods, number of reviewers, independence, kappa. | §3.4 | ✓ |
| Methods | **9** | *Data collection* | Specify data collection methods and reviewers. | §3.4 | ✓ |
| Methods | **10** | *Data items* | List and define all outcomes sought. | §3.4 + OR1.6 | ✓ |
| Methods | **11** | *Risk of bias assessment* | Specify methods for assessing study risk of bias. | §3.5 + OR1.7 | ✓ |
| Methods | **12** | *Effect measures* | Specify effect measure(s) used in synthesis. | §3.6 | ✓ |
| Methods | **13** | *Synthesis methods* | Describe synthesis processes and statistical methods. | §3.6 | ✓ |
| Methods | **14** | *Reporting bias assessment* | Describe methods for assessing reporting bias. | §3.6 | ✓ |
| Methods | **15** | *Certainty assessment* | Describe methods for assessing certainty of evidence. | §7.1 (limitation) | Partial - GRADE not applied; acknowledged §7.1 |
| Results | **16** | *Study selection* | Describe results of search and selection with flow diagram. | OR1.3 | ✓ (counts: 1455) |
| Results | **17** | *Study characteristics* | Cite included studies and present characteristics. | Tables 1–5; §4–5 | ✓ |
| Results | **18** | *Risk of bias in studies* | Present risk-of-bias assessments for each study. | §3.5 | ✓ |
| Results | **19** | *Results of studies* | Present summary statistics and effect estimates. | Tables 3, 4, 5, 6 | ✓ |
| Results | **20** | *Results of syntheses* | Summarise characteristics; present synthesis results. | §5.1–5.5 | ✓ |
| Results | **21** | *Reporting biases* | Present assessments of risk of bias from missing results. | §7.1 | ✓ |
| Results | **22** | *Certainty of evidence* | Present certainty assessments per outcome. | §7.1 (limitation) | Partial - qualitative discussion only |
| Discussion | **23** | *Discussion* | General interpretation of results in context of other evidence. | §6.1–6.3 | ✓ |
| Discussion | **24** | *Limitations* | Discuss limitations of included evidence. | §7.1 | ✓ |
| Discussion | **25** | *Conclusions* | General interpretation and future research implications. | §7.2 | ✓ |
| Other | **26** | *Registration & protocol* | Provide registration info or state not registered. | §3.1 | ✓ (not preregistered - declared) |
| Other | **27** | *Support* | Describe financial or other support for the review. | Declarations | ✓ |

*Note - Item 15 (Certainty assessment / GRADE): GRADE was not applied. Acknowledged as a limitation in §7.1. The Newcastle-Ottawa Scale provides a proxy indicator of evidence quality.*

**OR1.3 PRISMA 2020 Flow Diagram**

**Track A - Electronic database searches**

| **IDENTIFICATION**  **Web of Science [N = 348]**  **EBSCO Business Source Complete [N = 118]**  **Google Scholar [N = 1089]**  **ProQuest Academic One [N = 220]**  **EconStor [N = 25]**  **Total records from databases [N = 1800]** |
| --- |
| **REMOVAL BEFORE SCREENING**  **Duplicate records removed [N = 342]**  **Records removed by automation tools [N = 0]**  **Records excluded for other reasons before screening [N = 3]** |

**Track B - Supplementary sources**

| **IDENTIFICATION**  **Citation searching of key reviews [N =7]**  **Website / grey-literature searches (BMWK, GEM, Gründungsradar, ZEW, EXIST, IfM, RKW) [N = 7]**  **Total from supplementary sources [N = 7]** |
| --- |

**Merged tracks - Screening and inclusion**

| **SCREENING**  **Records screened (after deduplication) [N = 1455]**  **[N = 1379] records excluded at title/abstract stage**  **Records passing to full-text retrieval [N = 73]**  **Kappa at title/abstract stage: κ = 0.876** |
| --- |
| **ELIGIBILITY**  **Reports sought for retrieval [N = 73]**  **Reports not retrieved - reasons listed in OR1.8 [N = 0]**  **Full texts assessed for eligibility [N = 73]**  **Full texts excluded - reasons by code [N = 54]**  **Kappa at full-text stage: κ = 0.871** |
| **Full-text exclusions by reason**  **Code 1 - Wrong population: [N = 22]  Code 2 - Wrong outcome: [N = 17]  Code 3 - Wrong design: [N = 15]**  **Code 4 - Insufficient data: [N = 0]  Code 5 - Language: [N = 0]  Code 6 - Date: [N = 0]  Code 7/8 - Other: [N = 0]** |

**OR1.4 Databases and Sources Searched**

Six electronic databases were searched, supplemented by grey-literature and citation searching.

Date range applied to all databases: 1990 through December 2025. No language restriction was applied at the search stage; English and German records were retained at screening.

| **Database** | **Platform / Provider** | **Date searched** | **Search string** | **Records retrieved** |
| --- | --- | --- | --- | --- |
| Web of Science Core Collection | *Clarivate Analytics* | **18.12.2025** | OR1.5 - String A | **[N = 348]** |
| EBSCO Business Source Complete | *EBSCO Information Services* | **18.12.2025** | OR1.5 - String C | **[N = 118]** |
| Google Scholar | *Google / Publish or Perish (first 200 results per sub-string)* | **18.12.2025** | OR1.5 - String D | **[N = 1089]** |
| ProQuest Academic Onel | *ProQuest* | **18.12.2025** | OR1.5 - String E | **[N = 220]** |
| EconStor | *ZBW – Leibniz Information Centre for Economics* | **18.12.2025** | OR1.5 - String F | **[N = 25]** |

***Supplementary sources - Track B***

- Website / grey-literature searches: BMWK (bmwk.de); Gründungsradar annual reports (stifterverband.de); GEM Germany national reports (gemconsortium.org); EXIST program documentation (exist.de); Förderkreis Gründungs-Forschung (fgf-ev.de); ZEW Mannheim working papers (zew.de); IfM Bonn (ifm-bonn.org); RKW Kompetenzzentrum (rkw.de)

**OR1.5 Full Verbatim Search Strategies**

Search strings use three concept blocks combined with Boolean AND. Terms within each block are combined with OR. All strings are reproduced verbatim. Database-specific field tags are noted under each string.

***Concept Block 1 - Entrepreneurship Education or Training***

"entrepreneurship education" OR "entrepreneurship training" OR

"entrepreneurship program" OR "entrepreneurship course" OR

"entrepreneurial learning" OR "enterprise education" OR

"entrepreneurship teaching" OR "entrepreneurship curriculum" OR

"Entrepreneurship-Ausbildung" OR "Entrepreneurship-Lehre" OR

"Gründungsausbildung" OR "Gründungslehre" OR "Gründungsbildung" OR

"Gründungsqualifizierung" OR "Entrepreneurship-Qualifizierung" OR

"Innovationsbildung" OR "unternehmerische Bildung" OR

"Gründungsförderung in der Lehre"

***Concept Block 2 - German University Context***

German* OR Deutschland OR EXIST OR Hochschule* OR Universität* OR

"Karlsruhe Institute" OR KIT OR "Technical University Munich" OR TUM OR

"RWTH Aachen" OR "Ludwig-Maximilians" OR LMU OR "Freie Universität" OR

"University of Mannheim" OR Gründungsradar OR "HHL Leipzig" OR

Spinnovation OR "Stuttgart Media University"

***Concept Block 3 - Outcomes of Interest***

"entrepreneurial intention*" OR "entrepreneurial self-efficacy" OR

"entrepreneurial attitude*" OR "startup creation" OR "venture creation" OR

"firm founding" OR "firm growth" OR "venture performance" OR

"startup survival" OR "nascent entrepreneur*" OR Gründungsabsicht OR

Gründungsintention OR Gründungsverhalten OR Selbstwirksamkeit OR

"Start-Up" OR Startup OR Unternehmensgründung

**Web of Science
 *String A1 - German-context primary studies***

TS=("entrepreneurship education" OR "entrepreneurship training" OR "entrepreneurship program" OR "entrepreneurship course" OR "entrepreneurial learning" OR "enterprise education" OR "entrepreneurship teaching" OR "entrepreneurship curriculum" OR "Gründung*")

AND TS=("entrepreneurial intention*" OR "entrepreneurial self-efficacy" OR "entrepreneurial attitude*" OR "startup creation" OR "venture creation" OR "firm founding" OR "firm growth" OR "venture performance" OR "startup survival" OR "nascent entrepreneur*" OR "Gründungsabsicht" OR "Gründungsintention" OR "Entrepreneurship-Ausbildung" OR "Entrepreneurship-Lehre" OR "Gründungsausbildung" OR "Gründungslehre" OR "Gründungsbildung" OR "Gründungsqualifizierung" OR "unternehmerische Bildung" OR "Gründungsförderung")

AND (CU=Germany OR TS=(German* OR Deutschland OR "Hochschule*" OR "Universität*" OR "University*"))

AND DT=(Article OR Review OR Book OR "Book Chapter")

AND PY=(1990-2025)

***String A2 - International meta-analyses*** TS=("entrepreneurship education" OR "entrepreneurship training" OR

"entrepreneurship program" OR "entrepreneurship course" OR

"entrepreneurial learning" OR "enterprise education" OR

"entrepreneurship teaching" OR "entrepreneurship curriculum" OR

"Gründung*")

AND TS=("entrepreneurial intention*" OR "entrepreneurial self-efficacy" OR

"entrepreneurial attitude*" OR "startup creation" OR "venture creation" OR

"firm founding" OR "firm growth" OR "venture performance" OR

"startup survival" OR "nascent entrepreneur*" OR Gründungsabsicht OR

Gründungsintention)

AND TS=("meta-analy*" OR "systematic review" OR "meta-analytic review" OR

"literature review" OR "Literaturübersicht" OR "Überblicksstudie")

AND DT=(Article OR Review OR Book OR "Book Chapter")

AND PY=(1990-2025)

**EBSCO Business Source Ultimate**

***String B1 - German-context primary studies***

(TI("entrepreneurship education" OR "entrepreneurship training" OR "Gründungsausbildung" OR "Gründungslehre" OR "Gründungsbildung")
OR AB("entrepreneurship education" OR "entrepreneurship training" OR "entrepreneurship program" OR "entrepreneurship course" OR "entrepreneurial learning" OR "enterprise education" OR "entrepreneurship teaching" OR "entrepreneurship curriculum" OR "Entrepreneurship-Ausbildung" OR "Entrepreneurship-Lehre" OR "Gründungsausbildung" OR "Gründungslehre" OR "Gründungsbildung" OR "Gründungsqualifizierung" OR "unternehmerische Bildung" OR "Gründungsförderung")

OR SU("entrepreneurship education" OR "entrepreneurship training"))

AND (TI(German* OR Deutschland OR EXIST OR Hochschule* OR Universität*) OR AB(German* OR Deutschland OR "EXIST program" OR "EXIST funding" OR Hochschule* OR Universität* OR "Karlsruhe Institute" OR KIT OR "Technical University Munich" OR TUM OR "RWTH Aachen" OR "Ludwig-Maximilians" OR LMU OR "Freie Universität" OR "University of Mannheim" OR Gründungsradar OR "HHL Leipzig" OR Spinnovation OR "Stuttgart Media University"))

AND (AB("entrepreneurial intention*" OR "entrepreneurial self-efficacy" OR "entrepreneurial attitude*" OR "startup creation" OR "venture creation" OR "firm founding" OR "firm growth" OR "venture performance" OR "startup survival" OR "nascent entrepreneur*" OR Gründungsabsicht OR Gründungsintention OR Gründungsverhalten OR Selbstwirksamkeit OR "Start-Up" OR Startup OR Unternehmensgründung))

Limiters to apply in the EBSCO interface (not typed in the string box):

Language: English, German

Date: 1990–2025

Source type: Academic Journals, Conference Materials, Dissertations

***String B2 - International meta-analysis***

(TI("entrepreneurship education" OR "entrepreneurship training" OR

"Gründungsausbildung" OR "Gründungslehre" OR "Gründungsbildung")

OR AB("entrepreneurship education" OR "entrepreneurship training" OR

"entrepreneurship program" OR "entrepreneurship course" OR

"entrepreneurial learning" OR "enterprise education" OR

"entrepreneurship teaching" OR "entrepreneurship curriculum" OR

"Entrepreneurship-Ausbildung" OR "Entrepreneurship-Lehre" OR

"Gründungsausbildung" OR "Gründungslehre" OR "Gründungsbildung" OR

"Gründungsqualifizierung" OR "unternehmerische Bildung" OR

"Gründungsförderung")

OR SU("entrepreneurship education" OR "entrepreneurship training"))

AND (AB("entrepreneurial intention*" OR "entrepreneurial self-efficacy" OR

"entrepreneurial attitude*" OR "startup creation" OR "venture creation" OR

"firm founding" OR "firm growth" OR "venture performance" OR

"startup survival" OR "nascent entrepreneur*" OR Gründungsabsicht OR

Gründungsintention OR Gründungsverhalten OR Selbstwirksamkeit OR

"Start-Up" OR Startup OR Unternehmensgründung))

AND (AB("meta-analy*" OR "systematic review" OR "meta-analytic review" OR

"literature review") OR TI("meta-analy*" OR "systematic review"))

Language: English, German

Date: 1990–2025

Source type: Academic Journals, Conference Materials, Dissertations

**String C - Google Scholar**

Google Scholar was searched via Publish or Perish. Results were limited to 100 per sub-string due to Google Scholar's automated query rate limiting, a known constraint of this search method (Harzing, 2007). Five sub-strings were run separately with a minimum 15 minute interval between searches.

- C1 (English, education + outcomes): "entrepreneurship education" Germany intentions self-efficacy startup
- C2 (English, program evaluation): "entrepreneurship education" Germany EXIST "startup creation" OR "venture creation"
- C3 (German, education terms): "Gründungsausbildung" OR "Entrepreneurship-Ausbildung" OR "Gründungslehre" OR Hochschule Gründungsintention
- C4 (German, broader outcomes): "Gründungsbildung" OR "Gründungsqualifizierung" OR "Entrepreneurship-Lehre" Universität Deutschland Startup Unternehmensgründung
- C5 (synthesis studies): "entrepreneurship education" Germany "systematic review" OR "meta-analysis" OR "Gründungsausbildung"
- C6 (international synthesis studies): "entrepreneurship education" "meta-analysis" OR "systematic review" intentions self-efficacy "entrepreneurial"

**String D - ProQuest Academic One**

***String D1 - German-context primary studies:***
(ti,ab,su("entrepreneurship education" OR "entrepreneurship training" OR "entrepreneurship program" OR "entrepreneurship course" OR "entrepreneurial learning" OR "Entrepreneurship Ausbildung" OR "Entrepreneurship Lehre" OR "Gründungsausbildung" OR "Gründungslehre" OR "Gründungsbildung" OR "Gründungsqualifizierung" OR "unternehmerische Bildung" OR "Gründungsförderung"))

AND (ti,ab,su(German* OR Deutschland OR "EXIST program" OR "EXIST funding" OR Hochschule* OR Universität* OR "Karlsruhe Institute" OR KIT OR "Technical University Munich" OR TUM OR "RWTH Aachen" OR "Ludwig-Maximilians" OR LMU OR "Freie Universität" OR "University of Mannheim" OR Gründungsradar OR "HHL Leipzig" OR Spinnovation OR "Stuttgart Media University"))

AND (ti,ab,su("entrepreneurial intention*" OR "entrepreneurial self-efficacy" OR "entrepreneurial attitude*" OR "startup creation" OR "venture creation" OR "firm founding" OR "firm growth" OR "venture performance" OR "startup survival" OR "nascent entrepreneur*" OR Gründungsabsicht OR Gründungsintention OR Gründungsverhalten OR Selbstwirksamkeit OR "Start-Up" OR Startup OR Unternehmensgründung))

AND LA(ENGLISH OR GERMAN)

AND YR(1990-2025)

***String D2 - International meta-analysis:***

(ti,ab,su("entrepreneurship education" OR "entrepreneurship training" OR

"entrepreneurship program" OR "entrepreneurship course" OR

"entrepreneurial learning" OR "Entrepreneurship Ausbildung" OR

"Entrepreneurship Lehre" OR "Gründungsausbildung" OR "Gründungslehre" OR

"Gründungsbildung" OR "Gründungsqualifizierung" OR

"unternehmerische Bildung" OR "Gründungsförderung"))

AND (ti,ab,su("entrepreneurial intention*" OR "entrepreneurial self-efficacy"

OR "entrepreneurial attitude*" OR "startup creation" OR "venture creation" OR

"firm founding" OR "firm growth" OR "venture performance" OR

"startup survival" OR "nascent entrepreneur*" OR Gründungsabsicht OR

Gründungsintention OR Gründungsverhalten OR Selbstwirksamkeit OR

"Start-Up" OR Startup OR Unternehmensgründung))

AND (ti,ab,su("meta-analy*" OR "systematic review" OR "meta-analytic review"

OR "literature review" OR "Literaturübersicht"))

AND LA(ENGLISH OR GERMAN)

AND YR(1990-2025)

**String E - EconStor (German-language string)**

Platform: ZBW Leibniz Information Centre for Economics.

("entrepreneurship education" OR "Entrepreneurship-Ausbildung" OR

"Entrepreneurship-Lehre" OR "Gründungsausbildung" OR "Gründungslehre" OR

"Gründungsbildung" OR "Gründungsqualifizierung" OR

"Entrepreneurship-Qualifizierung" OR "Innovationsbildung" OR

"unternehmerische Bildung" OR "Gründungsförderung in der Lehre")

AND

(Deutschland OR German* OR EXIST OR Hochschule* OR Universität* OR

Gründungsradar OR "Karlsruhe" OR "München" OR "Berlin" OR "Aachen" OR

"Mannheim" OR "Hamburg" OR "Köln" OR KIT OR TUM OR LMU)

**OR1.6 PICOS Eligibility Criteria - Full Specification**

This review synthesizes existing meta-analyses and program evaluations rather than individual primary studies. The unit of analysis is defined at three tiers:

- Primary tier: Quantitative meta-analyses and systematic reviews of EE outcomes, any country. These capture international benchmarks applicable to the German context.
- Secondary tier: Quasi-experimental or experimental evaluations of German EE programs or policies, notably EXIST evaluations, providing causal evidence on startup formation or proximal outcomes.
- Narrative tier: German-context primary empirical studies. Incorporated narratively where they supply evidence not captured in existing syntheses; not tracked as primary screened units in the PRISMA flow.

**Population**

**Included:**

- Students enrolled at German universities (public or private) at any degree level across all fields of study
- Both nascent entrepreneurs and students with no prior entrepreneurial experience
- Alumni tracked within 10 years of graduation for distal behavioral outcomes
- Any country for meta-analyses and systematic reviews (international benchmark tier)

**Excluded:**

- Secondary school students (Gymnasium, Realschule)
- Vocational training students in the German Dual System unless enrolled in parallel university programs
- Non-German primary study populations unless German subsample data are separately reported
- Alumni more than 10 years post-graduation

**Intervention**

Included: Any formal entrepreneurship education intervention delivered by or formally affiliated with a German university - credit-bearing courses, entrepreneurship majors/minors/certificates, business plan competitions, university-affiliated accelerators, incubators and maker spaces, EXIST grants (Gründerstipendium, Potentiale, Forschungstransfer), and mentorship programs formally integrated into university structures.

Excluded: General business education without explicit entrepreneurship focus or content; purely informal learning such as student clubs without formal university affiliation; corporate training programs unaffiliated with any university; interventions with insufficient description to verify entrepreneurship content.

**Comparators**

Eligible designs include experimental and quasi-experimental (pre-post with and without control groups), cross-sectional comparisons (EE versus no-EE), longitudinal cohort studies, and retrospective studies with adequate confounding controls.

Comparator groups: no entrepreneurship education (control condition); general business education; pre-intervention baseline (within-subjects); different intensities or types of EE.

**Outcomes**

Primary proximal outcomes: entrepreneurial knowledge (declarative and procedural); entrepreneurial self-efficacy (overall and multidimensional); entrepreneurial attitudes (affective and instrumental); entrepreneurial intentions.

Primary distal outcomes: startup inception behavior (business registration, receipt of startup funding, first revenue, or self-reported venture founding); time-to-startup; firm growth (employment growth rate and revenue growth rate at years 1–5); startup survival at 1, 3, and 5-year marks; venture characteristics (technology orientation, growth ambition, international market scope).

Secondary outcomes: opportunity identification; network development; resource acquisition; entrepreneurial career choice.

Measurement requirements: quantitative measures suitable for effect size calculation; sufficient statistical information reported (means, SDs, correlation coefficients, odds ratios, or equivalent); validated instruments preferred but not required; clear operational definitions of constructs.

**Study Design**

Included: randomized controlled trials; quasi-experimental designs with comparison groups; longitudinal cohort studies; cross-sectional comparative studies; retrospective studies with adequate confounding controls; mixed-methods studies where the quantitative component meets the criteria above.

Excluded: purely qualitative studies (interviews, ethnography, focus groups only); single-person case studies; descriptive program reports without outcome data; opinion pieces, editorials, letters, and conceptual papers with no empirical data; conference abstracts without an associated full paper.

**Publication Characteristics**

Languages: English and German only. Date range: 1990 through December 2025. Publication types: peer-reviewed journal articles, conference proceedings, doctoral dissertations, official program evaluations (government and institutional), and working papers from recognized research institutions.

**OR1.7 Quality Assessment - Newcastle-Ottawa Scale**

Quality assessment used the modified Newcastle-Ottawa Scale (NOS; Wells et al., 2014; Park et al., 2022), applied to observational and quasi-experimental studies. The scale assesses three domains. Ratings informed sensitivity analyses examining whether lower-quality studies reported systematically larger effect sizes, as documented in prior EE meta-analyses (Bae et al., 2014; Martin et al., 2013).

| **Domain** | **Criteria assessed** | **Maximum stars** |
| --- | --- | --- |
| **Selection** | Representativeness of the exposed cohort; selection of the non-exposed cohort; demonstration that outcome of interest was not present at start of study | 4 stars |
| **Comparability** | Comparability of cohorts on the basis of the design or analysis; control for the most important factor and any additional factor | 2 stars |
| **Outcome** | Assessment of outcome; was follow-up long enough for outcomes to occur; adequacy of follow-up of cohorts | 3 stars |
| **Total** | ≥7 stars = high quality | 4–6 stars = moderate quality | <4 stars = low quality | **9 stars maximum** |

*For experimental paradigms accessed through published meta-analyses (e.g., Gollwitzer & Sheeran, 2006; Webb & Sheeran, 2006), quality was assessed through the internal methodological evaluations reported within those meta-analyses rather than by direct NOS application.*

**OR1.8 Excluded Studies (Full-Text Exclusions)**

The following table lists all 54 studies retrieved for full-text assessment and subsequently excluded, with the primary reason for exclusion. Per PRISMA 2020 Item 16b, one primary exclusion reason is listed per study even where multiple criteria applied. Exclusion codes follow the scheme defined in OR1.6 and the Screener Decision Guide.

| **ID** | **Full citation (APA)** | **Exclusion reason** |
| --- | --- | --- |
| FT19 | Jarke, M., Klamma, R., & Marock, J. (2003). Gründerausbildung und Gründernetze im Umfeld technischer Hochschulen: ein wirtschaftsinformatischer Versuch. https://www.researchgate.net/publication/216554326 | Code 1: Wrong population |
| FT20 | Klandt, H. (2004). Entrepreneurship education and research in German-speaking Europe. Academy of Management Learning & Education. https://doi.org/10.5465/AMLE.2004.14242226 | Code 3: Wrong design |
| FT21 | Golla, S., Halter, F., Fueglistaller, U., & Klandt, H. (2006). Gründungsneigung Studierender: Eine empirische Analyse in Deutschland und der Schweiz. https://doi.org/10.1007/3-540-28361-7_10 | Code 1: Wrong population |
| FT22 | Ruda, W., Walter, T. A., Ascúa, R., & Danko, B. (2008). Foundation Propensity and Entrepreneurship Characteristics of Students in Germany. ICSB World Conference Proceedings. https://ideas.repec.org/h/pkk/meb014/69-86.html | Code 2: Wrong outcome |
| FT23 | Mwasalwiba, E. S. (2010). Entrepreneurship education: a review of its objectives, teaching methods, and impact indicators. Education & Training. https://doi.org/10.1108/00400911011017663 | Code 2: Wrong outcome |
| FT24 | Rese, A., Baier, D., Mißler-Behr, M., & Kaiser, M. J. (2010). Entrepreneurship education. https://www.researchgate.net/publication/349483363 | Code 1: Wrong population |
| FT25 | Teixeira, A. A. C., & Davey, T. (2010). Attitudes of higher education students to new venture creation: The relevance of competencies and contextual factors. Industry & Higher Education. https://doi.org/10.5367/ihe.2010.0005 | Code 3: Wrong design |
| FT26 | Raposo, M., & Do Paço, A. (2011). Entrepreneurship education: links between education and entrepreneurial activity. International Entrepreneurship and Management Journal. https://doi.org/10.1007/s11365-010-0152-1 | Code 1: Wrong population |
| FT27 | Haase, H., & Lautenschläger, A. (2011). The 'teachability dilemma' of entrepreneurship. International Entrepreneurship and Management Journal. https://doi.org/10.1007/s11365-010-0150-3 | Code 3: Wrong design |
| FT28 | Bergmann, H., Cesinger, B., & Ostertag, F. (2012). Unternehmerische Absichten und Aktivitäten von Studierenden in Deutschland im internationalen Vergleich: Ergebnisse des Global University Entrepreneurial Spirit Students' Survey. https://www.researchgate.net/publication/267573588 | Code 3: Wrong design |
| FT29 | Weber, R. (2012). Evaluating entrepreneurship education. Springer. https://doi.org/10.1007/978-3-8349-3654-7 | Code 1: Wrong population |
| FT30 | Bureau, S., Salvador, E., & Fendt, J. (2012). Small firms and the growth stage: can entrepreneurship education programmes be supportive?. Industry & Higher Education. https://doi.org/10.5367/ihe.2012.0085 | Code 1: Wrong population |
| FT31 | Lorz, M., Mueller, S., & Volery, T. (2013). Entrepreneurship education: A systematic review of the methods in impact studies. Journal of Enterprising Culture. https://www.researchgate.net/publication/270725718 | Code 1: Wrong population |
| FT32 | Isfan, K., & Moog, P. (2013). Deutsche Hochschulen als Gründungsinkubatoren. https://doi.org/10.1007/978-3-322-81575-0 | Code 2: Wrong outcome |
| FT33 | Sassmannshausen, S. P., & Gladbach, S. (2013). Strengthening case study based teaching in entrepreneurship education in Germany: Theoretical reflections and explorative research. https://www.researchgate.net/publication/241674904 | Code 1: Wrong population |
| FT34 | Valerio, A., Parton, B., & Robb, A. (2014). Entrepreneurship education and training programs around the world: Dimensions for success. World Bank Publications. https://documents.worldbank.org/en/publication/documents-reports/documentdetail/237611468151500808 | Code 1: Wrong population |
| FT35 | Küttim, M., Kallaste, M., Venesaar, U., & Kiis, A. (2014). Entrepreneurship education at university level and students' entrepreneurial intentions. Procedia: Social and Behavioral Sciences. https://doi.org/10.1016/j.sbspro.2013.12.910 | Code 3: Wrong design |
| FT36 | Morton, C. S., Huang-Saad, A., & Libarkin, J. (2016). Entrepreneurship education for women in engineering: A systematic review of entrepreneurship assessment literature with a focus on gender. ASEE Annual Conference Proceedings. https://doi.org/10.18260/p.26725 | Code 1: Wrong population |
| FT37 | Bhatt, S., & Bhatt, A. (2016). Entrepreneurship education: A comparative study of literature. IUP Journal of Entrepreneurship Development. https://www.proquest.com/openview/632fb3b5cc8f9b58b75c35522bfb11f5 | Code 3: Wrong design |
| FT38 | Auzoult, L., Lheureux, F., & Abdellaoui, S. (2016). Are entrepreneurial intentions self-regulated? Self-consciousness, core self-evaluations and entrepreneurial intentions of higher education students. Spanish Journal of Psychology. https://doi.org/10.1017/sjp.2016.42 | Code 3: Wrong design |
| FT39 | Kulicke, M., & Seus, S. (2016). EXIST-Gründungskultur: Die Gründerhochschule. Fraunhofer ISI. https://doi.org/10.24406/publica-fhg-298780 | Code 3: Wrong design |
| FT40 | Jäger, D. A. (2016). Innovativität durch Entrepreneurship Education. University of Zurich. https://www.zora.uzh.ch/server/api/core/bitstreams/c9df585e-db86-46a9-aad4-e5be92a67242/content | Code 3: Wrong design |
| FT41 | Hasan, S. M., Khan, E. A., & Nabi, M. N. U. (2017). Entrepreneurial education at university level and entrepreneurship development. Education & Training. https://doi.org/10.1108/ET-01-2016-0020 | Code 1: Wrong population |
| FT42 | Miao, C., Qian, S., & Ma, D. (2017). The relationship between entrepreneurial self-efficacy and firm performance: A meta-analysis of main and moderator effects. Journal of Small Business Management. https://doi.org/10.1111/jsbm.12240 | Code 1: Wrong population |
| FT43 | Beliaeva, T., Laskovaia, A., & Shirokova, G. (2017). Entrepreneurial learning and entrepreneurial intentions: A cross-cultural study of university students. European Journal of International Management. https://doi.org/10.1504/EJIM.2017.10007649 | Code 2: Wrong outcome |
| FT44 | D'Souza, R. R., Clarkin, J. E., & Al-Bahrani, A. (2018). Starting early: The impact of experience based education on entrepreneurial intentions of high school students. Journal of Higher Education Theory and Practice. https://www.researchgate.net/publication/401243188 | Code 1: Wrong population |
| FT45 | Oftedal, E. M., Iakovleva, T. A., & Foss, L. (2018). University context matter: An institutional perspective on entrepreneurial intentions of students. Education & Training. https://doi.org/10.1108/ET-06-2016-0098 | Code 2: Wrong outcome |
| FT46 | Phillips, R. A. (2018). A retrospective study on the views of alumni entrepreneurs towards university enterprise education and training. IUP Journal of Knowledge Management. https://www.researchgate.net/publication/327558967 | Code 2: Wrong outcome |
| FT47 | Galvão, A., Ferreira, J. J., & Marques, C. (2018). Entrepreneurship education and training as facilitators of regional development: A systematic literature review. Journal of Small Business and Enterprise Development. https://doi.org/10.1108/JSBED-05-2017-0178 | Code 1: Wrong population |
| FT48 | Alanazi, A. A., & Templin, J. (2018). The impact of entrepreneurship education programs on entrepreneurship intention: Updating the field of entrepreneurship education. ProQuest Dissertations and Theses. https://kuscholarworks.ku.edu/server/api/core/bitstreams/3b408d40-f941-4fa7-8741-649986a4bcb0/content | Code 2: Wrong outcome |
| FT49 | Lahikainen, K., & Pihkala, T. (2018). European approaches to enterprise education. Routledge. https://doi.org/10.4324/9781315518213-1 | Code 2: Wrong outcome |
| FT50 | Şahin, F., Karadağ, H., & Tuncer, B. (2019). Big five personality traits, entrepreneurial self-efficacy and entrepreneurial intention: A configurational approach. International Journal of Entrepreneurial Behaviour & Research. https://doi.org/10.1108/IJEBR-07-2018-0466 | Code 2: Wrong outcome |
| FT51 | Liu, X., Lin, C., Zhao, G., & Zhao, D. (2019). Research on the effects of entrepreneurial education and entrepreneurial self-efficacy on college students' entrepreneurial intention. Frontiers in Psychology. https://doi.org/10.3389/fpsyg.2019.00869 | Code 1: Wrong population |
| FT52 | Vodă, A. I., & Florea, N. (2019). Impact of personality traits and entrepreneurship education on entrepreneurial intentions of business and engineering students. Sustainability. https://doi.org/10.3390/su11041192 | Code 2: Wrong outcome |
| FT53 | Fretschner, M., & Lampe, H. W. (2019). Detecting hidden sorting and alignment effects of entrepreneurship education. Journal of Small Business Management. https://doi.org/10.1111/jsbm.12448 | Code 3: Wrong design |
| FT54 | Kim, G., Kim, D., Lee, W. J., & Joung, S. (2020). The effect of youth entrepreneurship education programs: Two large-scale experimental studies. SAGE Open. https://doi.org/10.1177/2158244020956976 | Code 1: Wrong population |
| FT55 | Shneor, R., Smith, J. B., & Smith, C. G. (2021). The differential impact of entrepreneurship education on the entrepreneurial intentions of segments of students. Entrepreneurship Education and Pedagogy. https://doi.org/10.1177/2515127420936240 | Code 2: Wrong outcome |
| FT56 | Awotunde, O. M., & Van der Westhuizen, T. (2021). Entrepreneurial self-efficacy development: An effective intervention for sustainable student entrepreneurial intentions. International Journal of Innovation and Sustainable Development. https://doi.org/10.1504/IJISD.2021.118424 | Code 3: Wrong design |
| FT57 | Cunningham, J. A., & Menter, M. (2021). Transformative change in higher education: Entrepreneurial universities and high-technology entrepreneurship. Industry and Innovation. https://doi.org/10.1080/13662716.2020.1763263 | Code 2: Wrong outcome |
| FT58 | Rakicevic, Z., Rakicevic, J., Labrovic, J. A., & Ljamic-Ivanovic, B. (2022). How entrepreneurial education and environment affect entrepreneurial readiness of STEM and business students? A longitudinal study. Inžinerinė Ekonomika: Engineering Economics. https://doi.org/10.5755/j01.ee.33.4.30244 | Code 2: Wrong outcome |
| FT59 | Wang, X.-H., You, X., Wang, H.-P., Wang, B., Lai, W.-Y., & Su, N. (2023). The effect of entrepreneurship education on entrepreneurial intention: Mediation of entrepreneurial self-efficacy and moderating model of psychological capital. Sustainability. https://doi.org/10.3390/su15032562 | Code 1: Wrong population |
| FT60 | Sowa, T., & Lange-Pitsoulis, A. (2023). Gründungsförderung durch Gründungslehre? Zur Wirkung von Gründungslehre auf Gründungsintentionen und ihre Determinanten. https://www.researchgate.net/publication/389706454 | Code 1: Wrong population |
| FT61 | Buck, C., Eder, D. M., & Beermann, P. (2023). Entrepreneurship Education als Element des regionalen Innovationsökosystems: Aufbau und Elemente anhand des Fallbeispiels der Universität Bayreuth. Springer. https://doi.org/10.1007/978-3-658-37157-9_23 | Code 2: Wrong outcome |
| FT62 | Chen, P. (2024). Entrepreneurship education and college students' entrepreneurial intention: Mediating role of creativity. Social Behavior and Personality. https://doi.org/10.2224/sbp.13702 | Code 2: Wrong outcome |
| FT63 | Yang, L., Mu, X., & Xu, Y. (2024). Influence of entrepreneurship curriculum experience on entrepreneurial intention. Social Behavior and Personality. https://doi.org/10.2224/sbp.13032 | Code 1: Wrong population |
| FT64 | Tiberius, V. (2024). Didaktik der Entrepreneurship Education. Zeitschrift für ökonomische Bildung. https://www.zfoeb.de/2024_13/2024-13_1_74_tiberius.pdf | Code 3: Wrong design |
| FT65 | Dobrucka, R. (2024). Integrating entrepreneurial education to improve foundation readiness of chemistry students in Germany and Poland: A PDCA perspective. Academy of Entrepreneurship Journal. https://www.abacademies.org/articles/integrating-entrepreneurial-education | Code 2: Wrong outcome |
| FT66 | Passarelli, M., & Bongiorno, G. (2025). Is it the time to reshape entrepreneurship education? State-of-the-art and further perspectives. International Entrepreneurship and Management Journal. https://doi.org/10.1007/s11365-025-01071-y | Code 3: Wrong design |
| FT67 | Pop-Cohuț, I. C., Dodescu, A. O., Chirilă, L. F., & Barth, K. M. (2025). Entrepreneurship education and entrepreneurial intentions: A systematic review. Journal of Psychological and Educational Research. https://www.researchgate.net/publication/399718826 | Code 1: Wrong population |
| FT68 | Vedana, D., & Andreassi, T. (2025). A theoretical framework proposal for research and innovation opportunities in entrepreneurship education. Revista de Administração de Empresas. https://doi.org/10.1590/S0034-759020250302 | Code 1: Wrong population |
| FT69 | Ayandibu, E. O. (2025). Impact of entrepreneurship education on students' understanding of global markets and the productive economy: A literature review. International Journal of Research in Business and Social Science. https://doi.org/10.20525/ijrbs.v14i8.4522 | Code 3: Wrong design |
| FT70 | Cruz Salinas, L. E., Arbulu Ballesteros, M. A., Flores Lezama, M. T., Garcia Juarez, H. D., Otiniano Leon, M. Y., & Vera Calmet, V. G. (2025). Determinants of sustainable entrepreneurial intention: A multigroup analysis between public and private universities in industrial engineering. Sustainability. https://doi.org/10.3390/su17072824 | Code 3: Wrong design |
| FT71 | Al Issa, H.-E., Thai, M. T. T., & Saad, S. (2025). Empowering social entrepreneurial intentions through experiential learning and self-efficacy. International Journal of Management Education. https://doi.org/10.1016/j.ijme.2025.101154 | Code 1: Wrong population |
| FT72 | Setiawan, M. E., Suwono, H., Nur, H., Sulisetijono, S., et al. (2025). Fueling entrepreneurship in STEM: Unveiling trends, educational programs, and their impact. Social Sciences & Humanities Open. https://doi.org/10.1016/j.ssaho.2025.101798 | Code 2: Wrong outcome |

*Exclusion codes: 1 = Wrong population 2 = Wrong outcome 3 = Wrong design 4 = Insufficient data 5 = Language 6 = Date out of range 7 = Duplicate 8 = Not retrievable*
